# Supplementary material for: Application Prospects of FTIR Spectroscopy and CLSM to Monitor the Drugs Interaction with Bacteria Cells Localized in Macrophages for Diagnosis and Treatment Control of Respiratory Diseases
Source: MDPI journal article supplement (doi:10.3390/diagnostics13040698), 2023-02-12

## Supplementary Materials

# Application prospects of FTIR spectroscopy and CLSM to monitor the drugs interaction with bacteria cells localized in macrophages for diagnosis and treatment control of respiratory diseases

Igor D. Zlotnikov <sup>1</sup>, Alexander A. Ezhov <sup>2</sup>, Maksim A. Vigovskiy <sup>3,4</sup>, Olga A. Grigorieva <sup>3,4</sup>, Uliana D. Dyachkova <sup>3,4</sup>, Natalya G. Belogurova <sup>1</sup>, and Elena V. Kudryashova <sup>1,\*</sup>

<sup>1</sup> Faculty of Chemistry, Lomonosov Moscow State University, Leninskie Gory, 1/3, 119991 Moscow, Russia

<sup>2</sup> Faculty of Physics, Lomonosov Moscow State University, Leninskie Gory, 1/2, 119991 Moscow, Russia

<sup>3</sup> Medical Research and Education Center, Institute for Regenerative Medicine, Lomonosov Moscow State University, 27/10, Lomonosovsky Ave., 119192 Moscow, Russia

<sup>4</sup> Faculty of Medicine, Lomonosov Moscow State University, 27/1, Lomonosovsky prosp., 119192 Moscow, Russia

\* Correspondence: Helena\_koudriachova@hotmail.com (E.V.K.)

## Content

**Figure S1.** FTIR spectra of *E. coli* incubated with drug delivery system HPCD-PEI1.8-triMan. T = 22 °C.

**Figure S2.** Emission fluorescence spectra of FITC (drug delivery system labelled), eosin (*E. coli* labelled) and Dox obtaining by CLSM.  $\lambda_{em} = 488$  nm (multiline Argon laser).

**Figure S3.** Confocal laser scanning images of CD206+ macrophages with absorbed eosin-labelled *E. coli*. Incubation with Dox and FITC-labeled HPCD-PEI1.8-triMan. The scale segment is 100  $\mu\text{m}$  (division value is 20  $\mu\text{m}$ ); 4–6 channels are shown: red, Dox; green, FITC; magenta, eosin; gray, transmission light mode; and overlay.  $\lambda_{em} = 488$  nm (multiline Argon laser).

**Figure S1.** FTIR spectra of *E. coli* incubated with drug delivery system HPCD-PEI1.8-triMan. T = 22 °C.

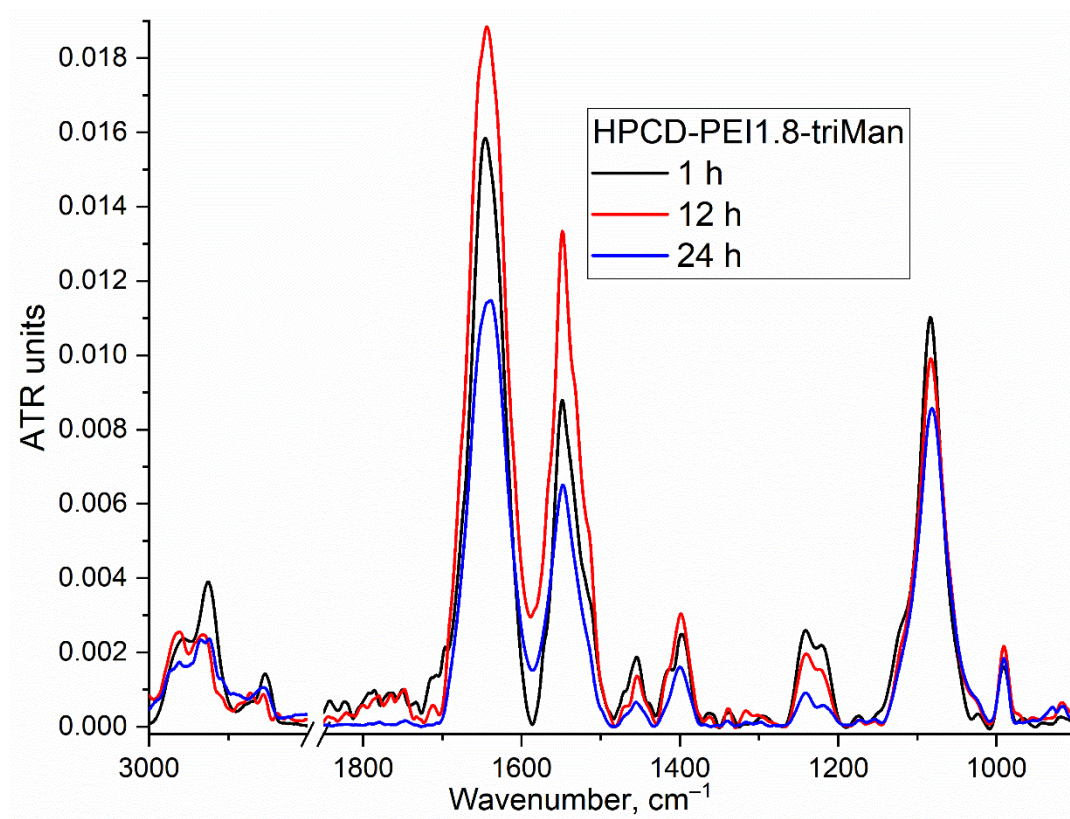

**Figure S2.** Emission fluorescence spectra of FITC (drug delivery system labelled), eosin (*E. coli* labelled) and Dox obtaining by CLSM.  $\lambda_{em} = 488$  nm (multiline Argon laser).

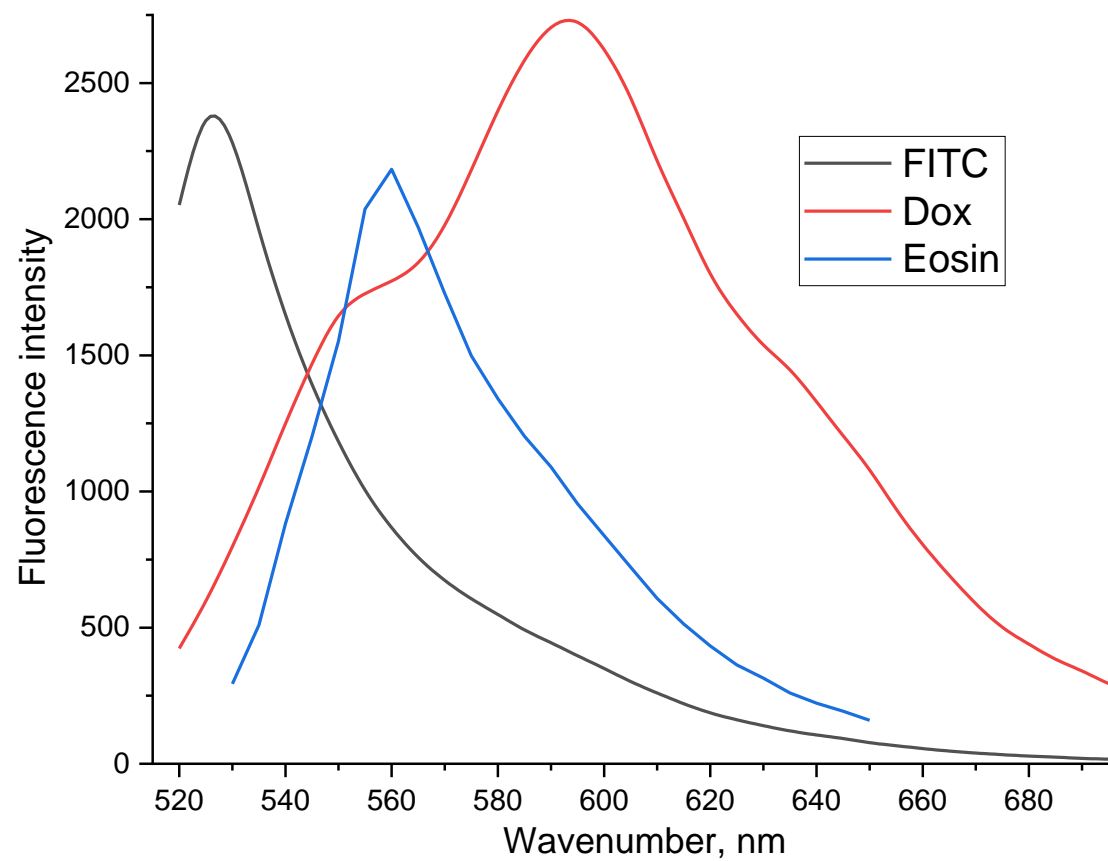

**Figure S3.** Confocal laser scanning images of CD206+ macrophages with absorbed eo-sin-labelled E. coli. Incubation with Dox and FITC-labeled HPCD-PEI1.8-triMan. The scale segment is 100  $\mu\text{m}$  (division value is 20  $\mu\text{m}$ ); 4–6 channels are shown: red, Dox; green, FITC; magenta, eosin; gray, transmission light mode; and overlay.  $\lambda_{\text{em}} = 488 \text{ nm}$  (multiline Argon laser).

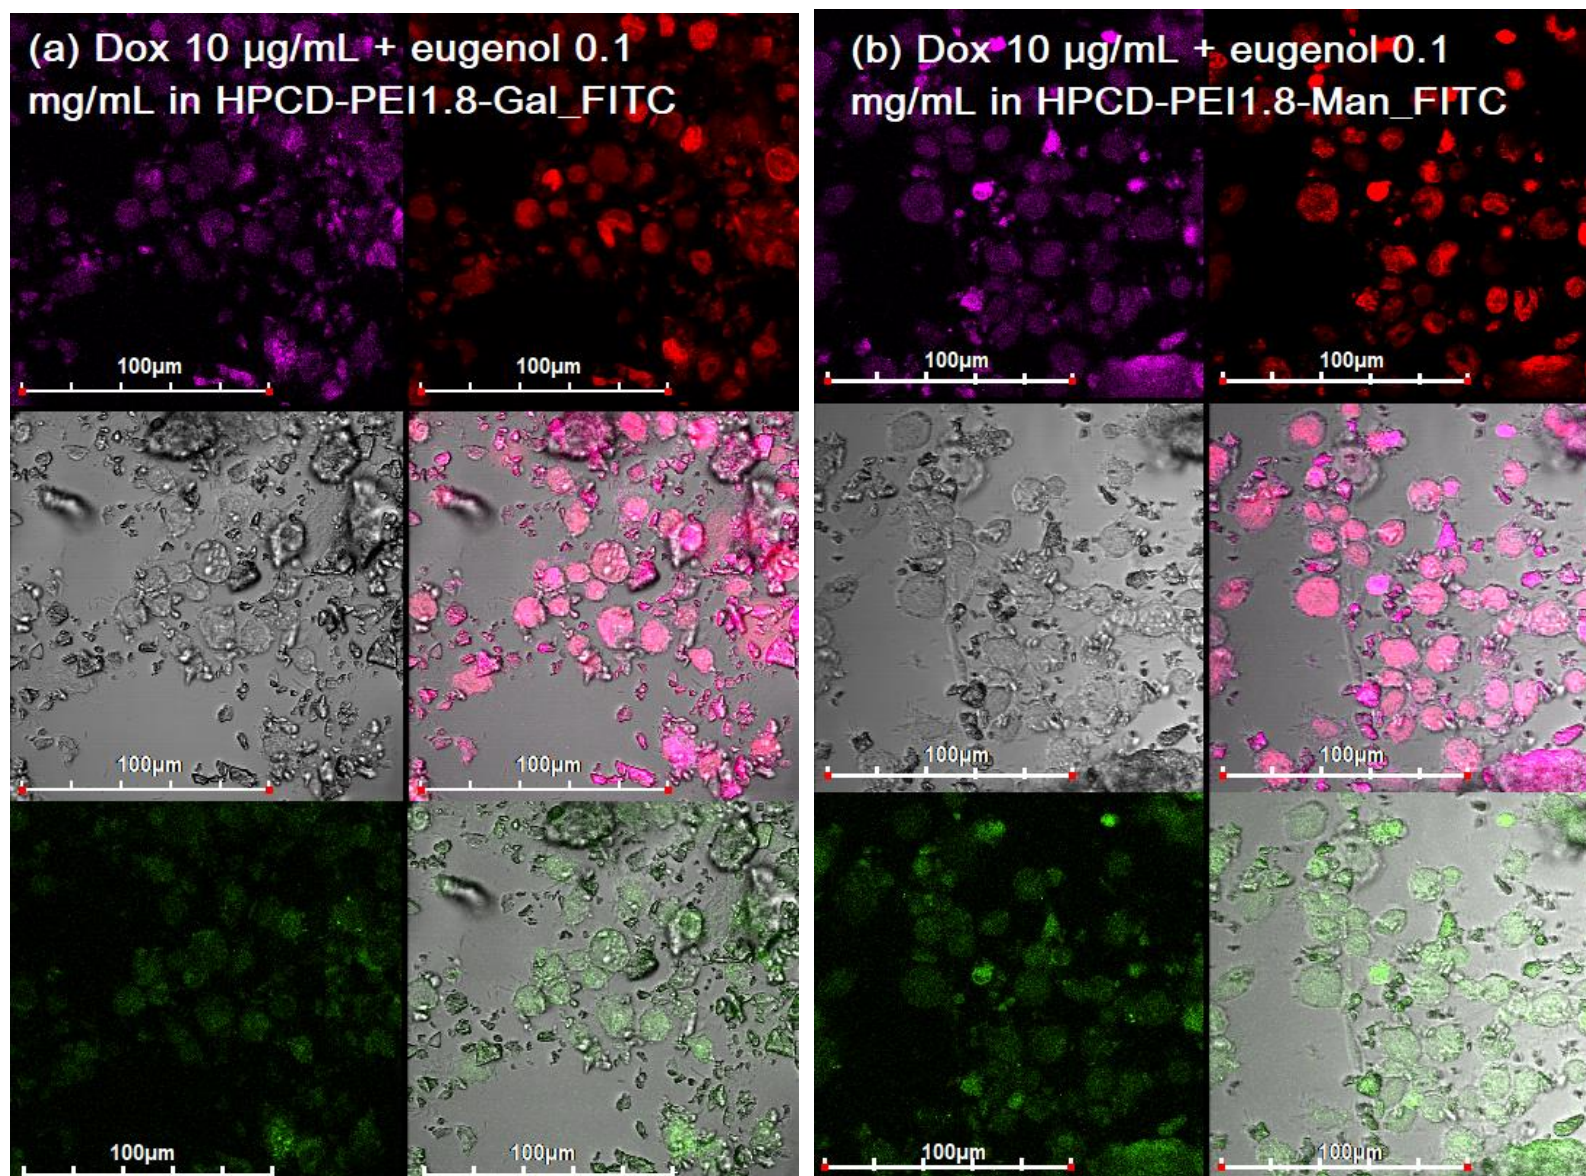

Supplement: s1 [file s1]
